# Supplementary material for: Biocompatibility Analysis of Bio-Based and Synthetic Silica Nanoparticles during Early Zebrafish Development
Source: MDPI journal article supplement (doi:10.3390/ijms25105530), 2024-05-18
Supplement: s1 [file s1]

**Table S1.** Primer sequences of genes evaluated in this paper

| Neurotoxicity                            | Forward (5'-3')           | Reverse (5'-3')           |
|------------------------------------------|---------------------------|---------------------------|
| <i>rpl13a</i>                            | TCTGGAGGACTGTAAGAGGTATGC  | AGACGCACAATCTTGAGAGCAG    |
| <i>β-synuclein</i>                       | ATGGATGTTTTATGAAGGGGC     | ACGCTGTCTTTGGTCTTGCT      |
| <i>parkin</i>                            | GCGAGTGTGTCTGAGCTGAA      | ATCACAGCCCTGAAGTGTGG      |
| <i>pink1</i>                             | GGCAATGAAGATGATGTGGAAC    | ATCACGTTGGGATGAGCACT      |
| <i>uch-l1</i>                            | CTTCCCTTTAACGCAACAGC      | CCCACAGTTCCACAGGAGTT      |
| <i>park7</i>                             | TGTTACTGTCTGCAGGTCTGG     | CAGGCAGAAGAACAACGTCA      |
| <i>atg5</i>                              | AGGGGATAACAGCACAAACG      | CTTCTTATGCAGCGTGTCCA      |
| <i>ambra1a</i>                           | TAACCAGGAAACTGGCCAAC      | AATATGCTGCAGGGGACAAC      |
| <i>gfap</i>                              | GGATGCAGCCAATCGTAAT       | TTCCAGGTCACAGGTCAG        |
| <i>gap43</i>                             | CAGCCGACGTGCCTGAA         | GGATTCCTCAGCAGCGTCTG      |
| <b>Inflammation and oxidative stress</b> |                           |                           |
| <i>il8</i>                               | GTCGCTGCATTGAAACAGAA      | CTTAACCCATGGAGCAGAGG      |
| <i>cxcl-cic</i>                          | CATCCGGCCAGCTCTGCTTGAAT   | CCACTCTTGACCTCCTGTGCTCTCT |
| <i>ccl34a.4</i>                          | CTTTGACGCATGGAGGATTT      | TGCAGCTCAACCAGAAGATG      |
| <i>nfkb2</i>                             | TGGCTGGAGCACTAAGGATG      | CCTCTCTGCTTTGGCTCCTC      |
| <i>nfkb1a</i>                            | ACAACCGAAGAGAGAACATGGA    | CGAAATCTCCCGCGTCTCAT      |
| <i>tnfa</i>                              | CGCTGGTGATGGTGTCTAGG      | CCCTGGGTCTTATGGAGCGT      |
| <i>il1β</i>                              | CGTACTCAAGGAGATCAGCGG     | GCGGTGCTGATAAACCAACC      |
| <i>il6</i>                               | GGCATTGTAAGGGGTCAGGA      | GCGTTAGACATCTTTCCGTGC     |
| <i>hmox1a</i>                            | CCACGTCAGAGCTGAAAACA      | AGCGCTCGGTAGATCTCGTA      |
| <i>nrf2a</i>                             | GAGCGGGAGAAATCACACAGAATG  | CAGGAGCTGCATGCACTCATCG    |
| <i>nrf2b</i>                             | GGCAGAGGGAGGAGGAGACCAT    | AAACAGCAGGGCAGACAACAAGG   |
| <b>Housekeeping</b>                      |                           |                           |
| <i>ism12b</i>                            | AGTTGTCCCAAGCCTATGCAATCAG | CCACTCAGGAGGATAAAGACGAGTC |

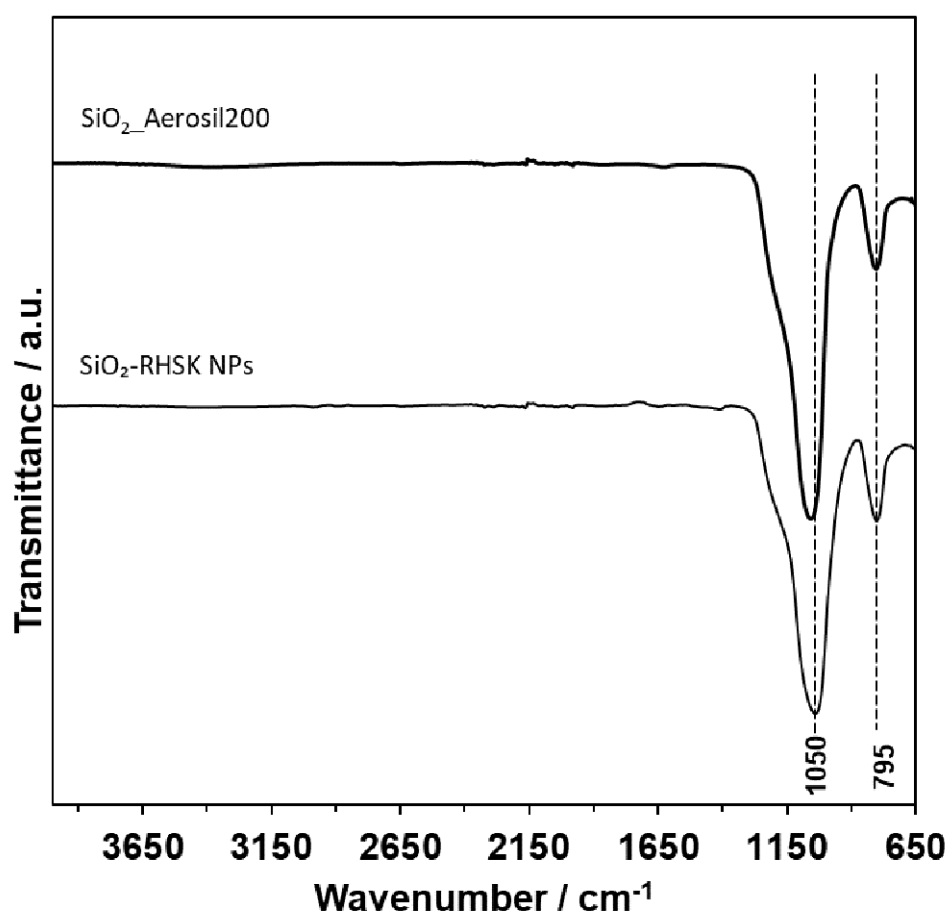

**Figure S1. FTIR-ATR spectrometry.** The FTIR spectra for both samples exhibited bands at ca. 800 and 1050 cm<sup>-1</sup>, which can be assigned to the symmetric and asymmetric stretching vibration of Si-O-Si bonds, respectively. As expected, similar spectra were obtained for SiO<sub>2</sub>-RHSK NPs and SiO<sub>2</sub>-Aerosil200.

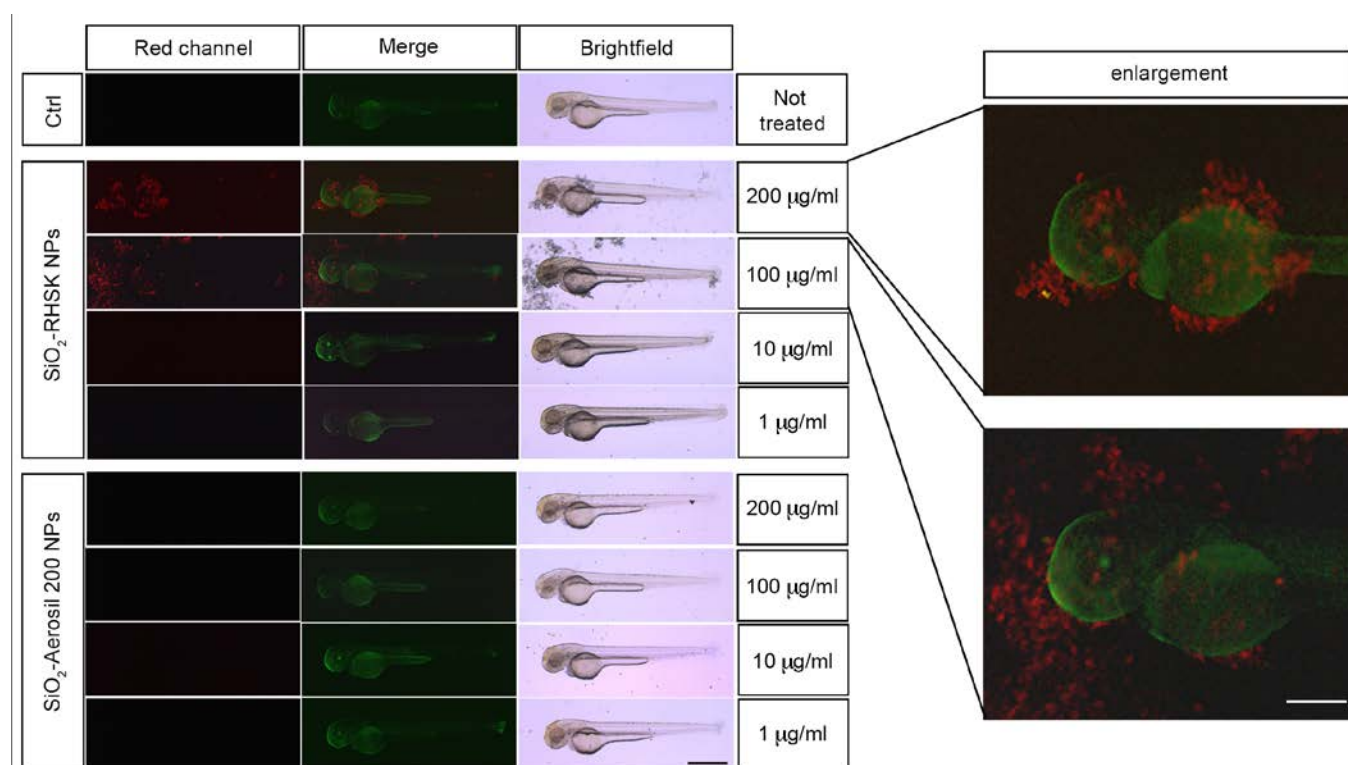

**Figure S2. Representative images of embryos at 72 hpf exposed to SiO<sub>2</sub>-RHSK and SiO<sub>2</sub>-Aerosil200 NPs at different concentrations for 48 h, showing visible SiO<sub>2</sub>-RHSK NPs agglomerates under a fluorescent stereomicroscope.**

To evaluate the NPs behavior after suspension in the FET solution, embryos exposed to SiO<sub>2</sub>-Aerosil200 and SiO<sub>2</sub>-RHSK NPs at different concentrations were observed under a fluorescent stereomicroscope. The magnifications showed that agglomerated of SiO<sub>2</sub>-RHSK NPs are visible around the embryos at 72 hpf developmental stage, especially at higher concentrations (100 and 200 µg/ml). Scale bar: 100 µm.
